# Supplementary material
Source: Research Square preprint supplement (doi:10.21203/rs.3.rs-9246305/v1)
Supplement: Supplementary file 1 [file 72c6994a6854e5dc38970140.pdf]

## **Supplementary Material**

### **In-depth longitudinal study on hepatitis E virus evolution in chronic infection with ribavirin treatment failure**

Dominik Harms\*, Christian Patrick Papp, Britta Altmann, Daniel Todt, Patrycja Klink, Jens Kurreck, Reimar Johne, Jörg Hofmann, C.-Thomas Bock

**\*Correspondence:** Dominik Harms, [HarmsD@rki.de](mailto:HarmsD@rki.de)

**Table S1.** Details of nested PCR fragments amplified from HEV cDNA and used for sequencing.

| Fragment | Length [bp] | Nucleotide position (47832c) | Nucleotide position (1a-Burma) |
|----------|-------------|------------------------------|--------------------------------|
| F1.2     | 2200        | 34–2233                      | 36–2238                        |
| F2.2     | 1514        | 2569–4082                    | 2219–3868                      |
| F3.2     | 2212        | 3716–5927                    | 3502–5716                      |
| F4.2     | 1684        | 5688–7371                    | 5477–7159                      |
| F5.2     | 7220        | 30–7249                      | 32–7257                        |
| HVR2     | 472         | 2133–2604                    | 2135–2390                      |

**Table S2.** Details on HEV-specific primers and cycling conditions for amplification of first PCR fragments (F1.1-F4.1) and nested fragments (F1.2-F4.2), and HVR fragments (HVR1 and HVR2). Sequences of forward (F) and reverse (R) primers indicated. For a first round of PCR (Fx.1/HVR1), 2.5 µl cDNA was used in a 25 µl reaction. For nested PCR (Fx.2/HVR2), 0.5 µl of the first was used in a 25 µl reaction. For culture samples, F2.1/F2.2 required primer re-design due to the presence of a dominant 3' mismatch in the primer binding region, and subsequent re-amplification and re-sequencing. Similar re-design was required for F3.1, albeit only for culture A Ctrl samples from w34, w54, and w60.

| Fragment | Primers                                                                                                                           | Cycling conditions                                      |
|----------|-----------------------------------------------------------------------------------------------------------------------------------|---------------------------------------------------------|
| F1.1     | Fw1: 5'- CCACCAGTTCATTAAGGCTCCT<br>Rv1: 5'- CCTCTTGGGGTTATGCTCAAC                                                                 | 30" 98°C; [10" 98°C; 30" 68°C; 90" 72°C] 35x; 120" 72°C |
| F1.2     | Fw2: 5'- CCACCAGTTCATTAAGGCTCCT<br>Rv2: 5'- AGGAGGTTTAGGGTGGCRTA                                                                  | 30" 98°C; [10" 98°C; 30" 68°C; 75" 72°C] 30x; 120" 72°C |
| F2.1     | Fw1: 5'- CACCCGCCGCCTTCTTTA<br>Fw1a: 5'- CACCCGCCGCCTTCTT<br>Rv1: 5'- GGGATGAATCTAGCCAGGGAC                                       | 30" 98°C; [10" 98°C; 30" 68°C; 60" 72°C] 35x; 120" 72°C |
| F2.2     | Fw2: 5'- CACCCGCCGCCTTCTTTA<br>Fw2a: 5'- CACCCGCCGCCTTCTT<br>Rv2: 5'- CAGACACCGTAAGCTCCTGAG<br>Rv2a: 5'- ACTATGTCCGTGAGTTCAAAGACT | 30" 98°C; [10" 98°C; 30" 68°C; 50" 72°C] 30x; 120" 72°C |
| F3.1     | Fw1: 5'- GCHAGGGGGCTYATYCAATC<br>Rv1: 5'- CGGGAYACACGAGTGTTTRGTG<br>Rv1a: 5'- CGGGAYACACGAGTGTTGGTR                               | 30" 98°C; [10" 98°C; 30" 69°C; 90" 72°C] 35x; 120" 72°C |
| F3.2     | Fw2: 5'- GCHAGGGGGCTYATYCAATC<br>Rv2: 5'- AGCRCGYACAACCCGATACTG                                                                   | 30" 98°C; [10" 98°C; 30" 69°C; 90" 72°C] 30x; 120" 72°C |
| F4.1     | Fw1: 5'- CAGTGGTTTCTGGGGTGACA<br>Rv1: 5'- AAAGCTATGAAGGGGGCACAA                                                                   | 30" 98°C; [10" 98°C; 30" 68°C; 60" 72°C] 35x; 120" 72°C |
| F4.2     | Fw2: 5'- CAGTGGTTTCTGGGGTGACA<br>Rv2: 5'- ACTGCCGTTTACCTGCT                                                                       | 30" 98°C; [10" 98°C; 30" 68°C; 60" 72°C] 30x; 120" 72°C |
| F5.1     | Fw1: 5'- AGGCCAYCAGTTYATTAAGGCTCCTGGCATYACT<br>Rv1: 5'- CACACCCCTGCAAACCAAGRGCGRCACTCCGG                                          | 5' 95°C; [20" 98°C; 8' 74°C] 35x; 5' 74°C               |
| F5.2     | Fw1: 5'- AGGCCAYCAGTTYATTAAGGCTCCTGGCATYACT<br>Rv2: 5'- CGGCACTCAGGGCAGAAATCATCRAAAGTRTGGG                                        | 5' 95°C; [20" 98°C; 8' 74°C] 35x; 5' 74°C               |
| HVR1     | Fw1: 5'- CGCATAGCCTCTCCTACGA<br>Rv1: 5'- CCTCTTGGGGTTATGCTCAAC                                                                    | 30" 98°C; [10" 98°C; 30" 65°C; 40" 72°C] 35x; 120" 72°C |
| HVR2     | Fw2: 5'- GGACATGGTCAACATCTGGT<br>Rv2: 5'- GCCCATCCGGATAGGTG                                                                       | 30" 98°C; [10" 98°C; 30" 66°C; 15" 72°C] 30x; 120" 72°C |

**Table S3.** Absolute numbers of synonymous and non-synonymous variants detected at  $\geq 5\%$ ,  $\geq 20\%$ , and  $\geq 50\%$  frequencies in patient and *in vitro* (adapted; naïve) timepoints. *In vitro* data is background-corrected against w1 variant counts.

| Model    | Timepoint | # synonymous |             |             | # non-synonymous |             |             |
|----------|-----------|--------------|-------------|-------------|------------------|-------------|-------------|
|          |           | $\geq 5\%$   | $\geq 20\%$ | $\geq 50\%$ | $\geq 5\%$       | $\geq 20\%$ | $\geq 50\%$ |
| Patient  | m76.5     | 42           | 269         | 202         | 14               | 69          | 57          |
|          | m95.2     | 177          | 17          | 274         | 51               | 6           | 71          |
| Adapted  | Ctrl_w18  | 22           | 8           | 0           | 7                | 4           | 0           |
|          | Ctrl_w31  | 46           | 14          | 0           | 4                | 5           | 0           |
|          | RBV_w31   | 69           | 27          | 1           | 23               | 6           | 0           |
|          | Ctrl_w34  | 29           | 13          | 2           | 9                | 2           | 1           |
|          | RBV_w34   | 88           | 13          | 15          | 39               | 2           | 6           |
|          | Ctrl_w54  | 43           | 2           | 10          | 7                | 0           | 3           |
|          | RBV_w54   | 77           | 24          | 27          | 29               | 5           | 7           |
|          | Ctrl_w60  | 23           | 1           | 11          | 5                | 0           | 3           |
| Naïve    | RBV_w60   | 102          | 14          | 40          | 39               | 7           | 7           |
|          | Ctrl_w5   | 17           | 0           | 0           | 4                | 2           | 0           |
|          | Ctrl_w20  | 26           | 7           | 0           | 14               | 2           | 0           |
|          | RBV_w20   | 113          | 12          | 0           | 35               | 7           | 0           |
|          | Ctrl_w23  | 21           | 10          | 0           | 12               | 5           | 8           |
|          | RBV_w23   | 94           | 6           | 4           | 36               | 6           | 4           |
|          | Ctrl_w40  | 42           | 13          | 1           | 13               | 6           | 2           |
|          | RBV_w40   | 126          | 20          | 24          | 44               | 5           | 14          |
| Ctrl_w43 | 43        | 13           | 1           | 14          | 2                | 6           |             |
| RBV_w43  | 98        | 25           | 19          | 40          | 6                | 14          |             |

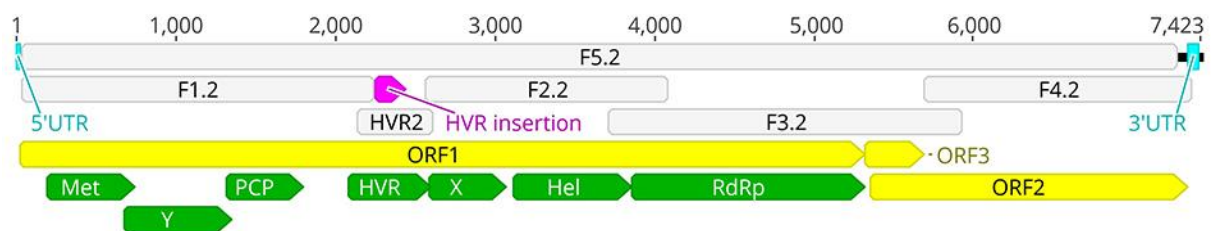

**Figure S4.** Position of nested PCR fragments within the HEV 47832c genomes (nucleotide positions on top). 5' and 3'UTRs, ORFs with functional domains, as well as the ORF1 insertion within the HVR are annotated.

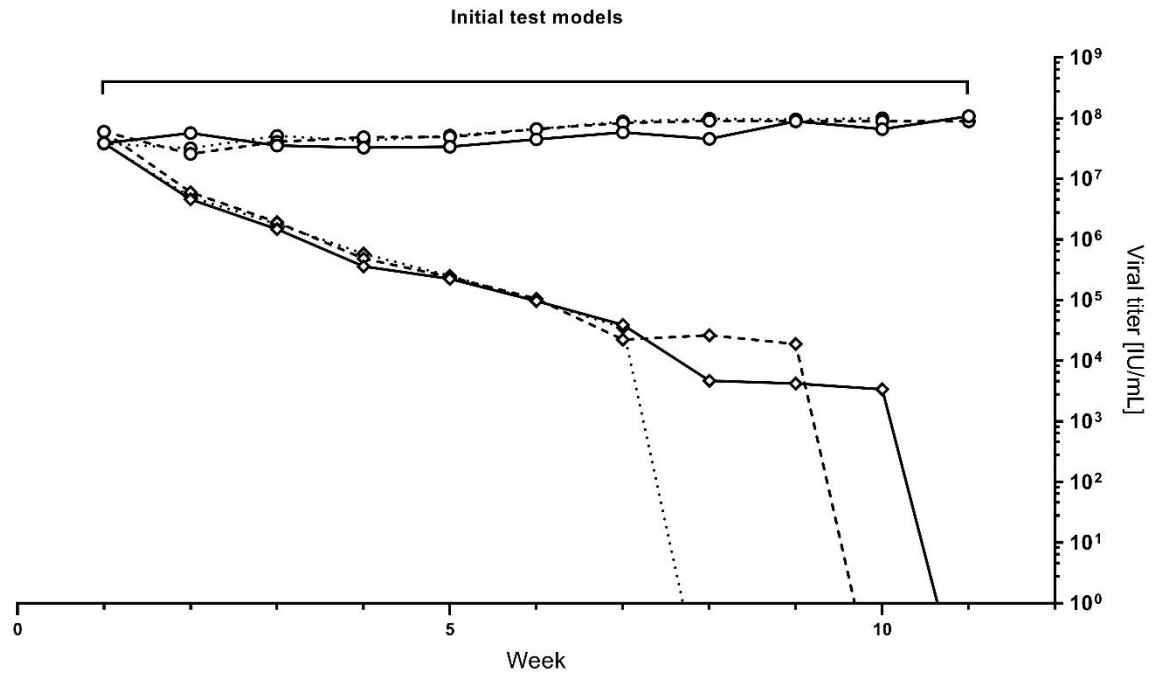

**Figure S5.** HEV titer (in IU/ml) progression in *in vitro* pre-testing of untreated (circles) or continuously treated (diamonds) with RBV 100  $\mu$ M. Replicates are denoted by solid, broken, and dotted lines. Period of RBV treatment denoted by black bracket.

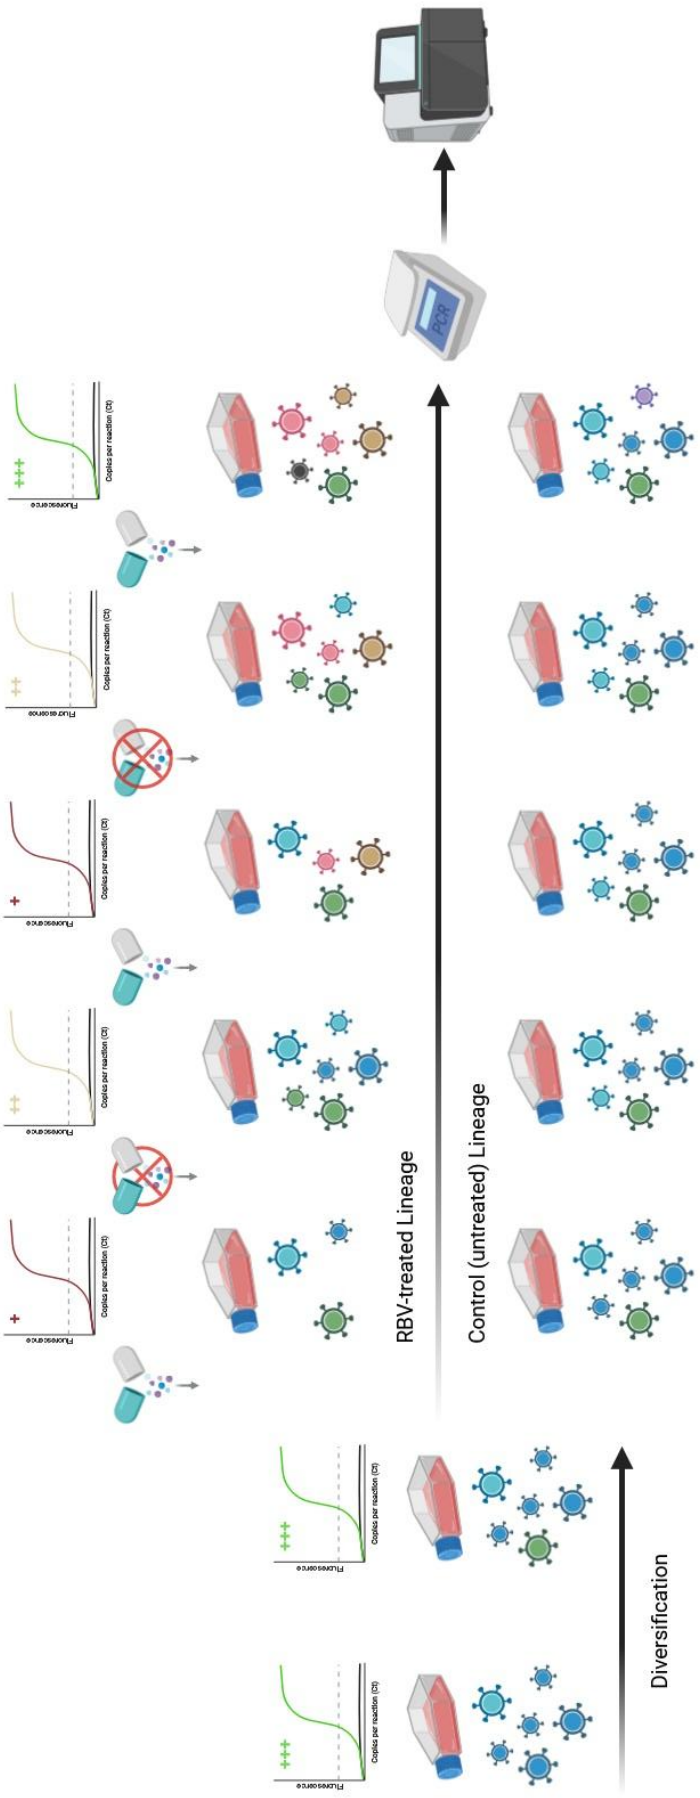



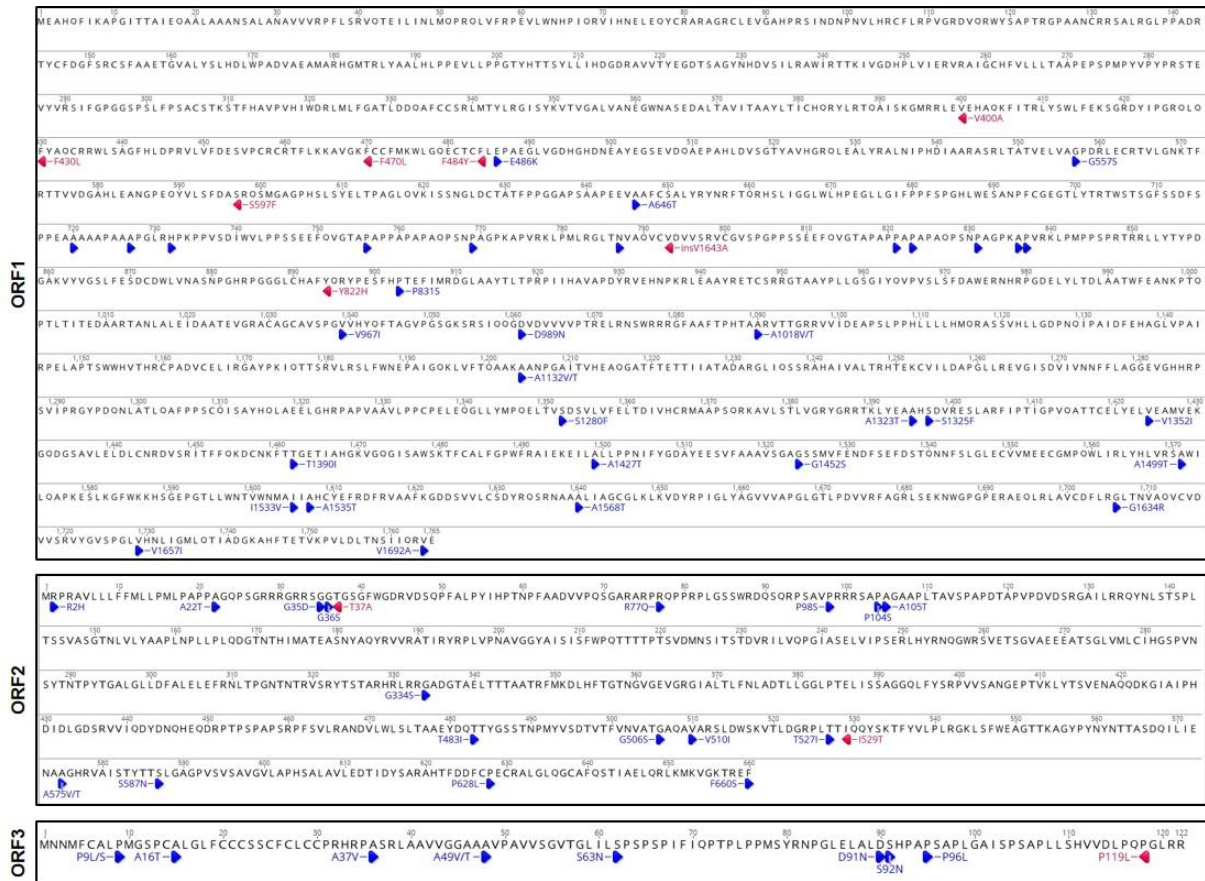

**Figure S8.** Distribution of Ctrl-specific (blue) and RBV-specific (red) non-synonymous variants (n) commonly detected  $\geq 5\%$  frequency in in vitro timepoints of both cultures.
